# Supplementary material
Source: publisher site journal article supplement (https://www.dovepress.com/article/421213)
Supplement: Supplementary file 1 [file get_supplementary_file.php]

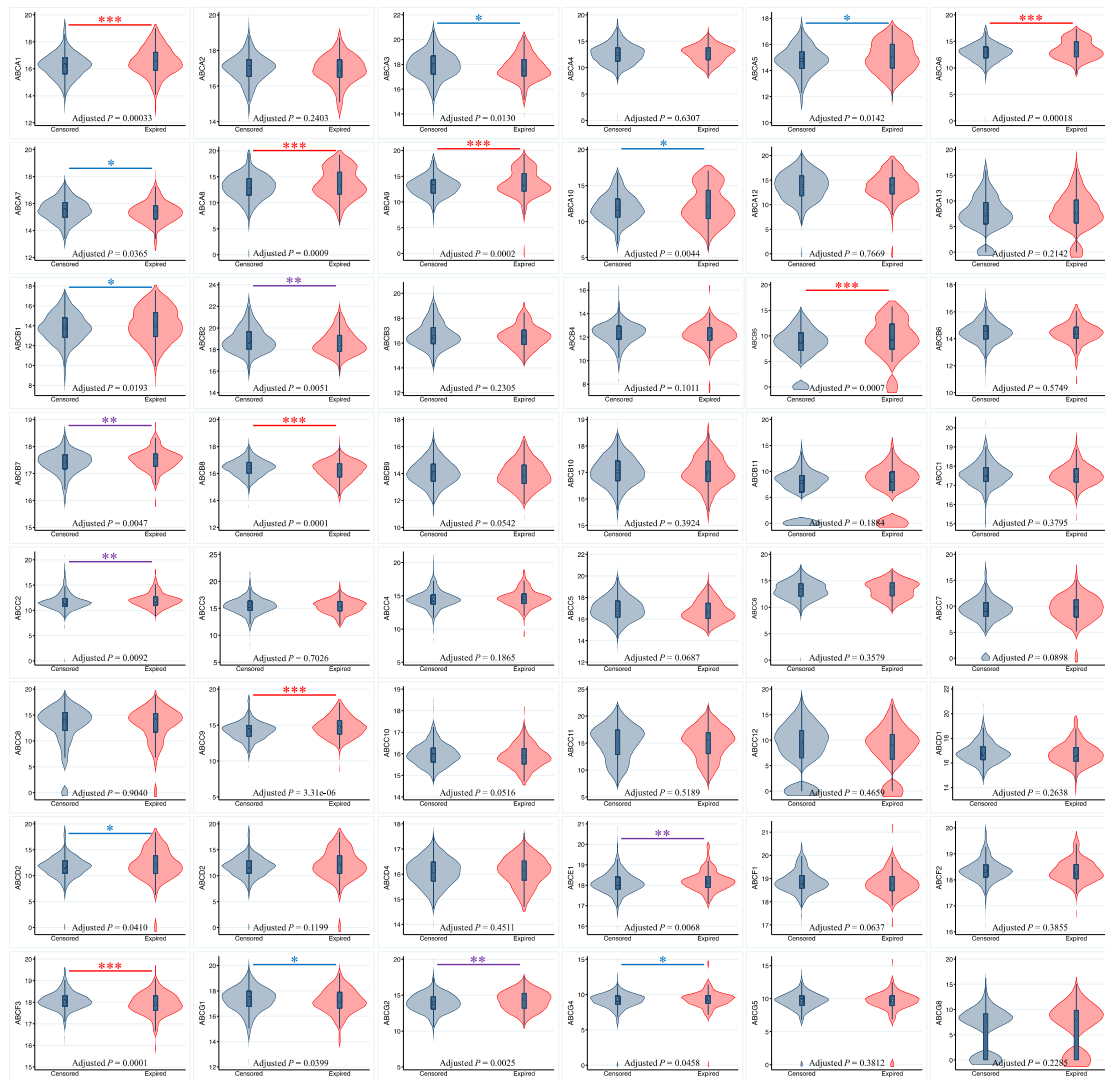

1

2 **Figure S1** Forty-eight ABC transporters in 1217 breast cancer samples obtained from  
 3 TCGA dataset. \* $P < 0.05$  (blue color), \*\* $P < 0.01$  (purple color), \*\*\* $P < 0.001$  (red  
 4 color).

5

6

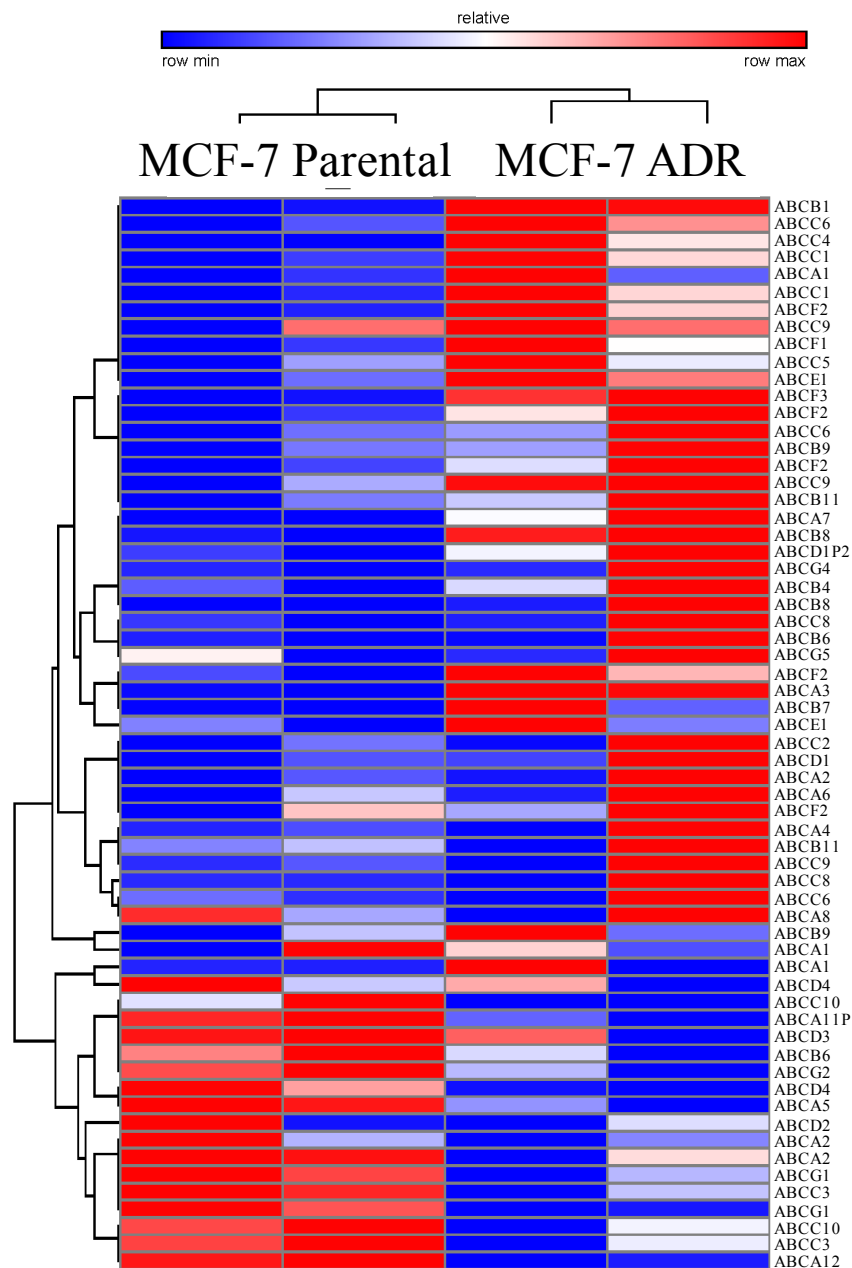

7

8 **Figure S2 Gene expression of ABC transporters in doxorubicin-selected MCF-**

9 **7/ADR cells.** Raw data for GSE24460 dataset is analyzed. The heatmap shows ABC

10 transporters genes ranked from the highest level of expression to the lowest level of

11 expression in doxorubicin-selected MCF-7/ADR and MCF-7 parental cells. ABCB1

12 ranked the highest expressive gene of ABC transporters in doxorubicin-selected MCF-

13 7/ADR cell.

**A**

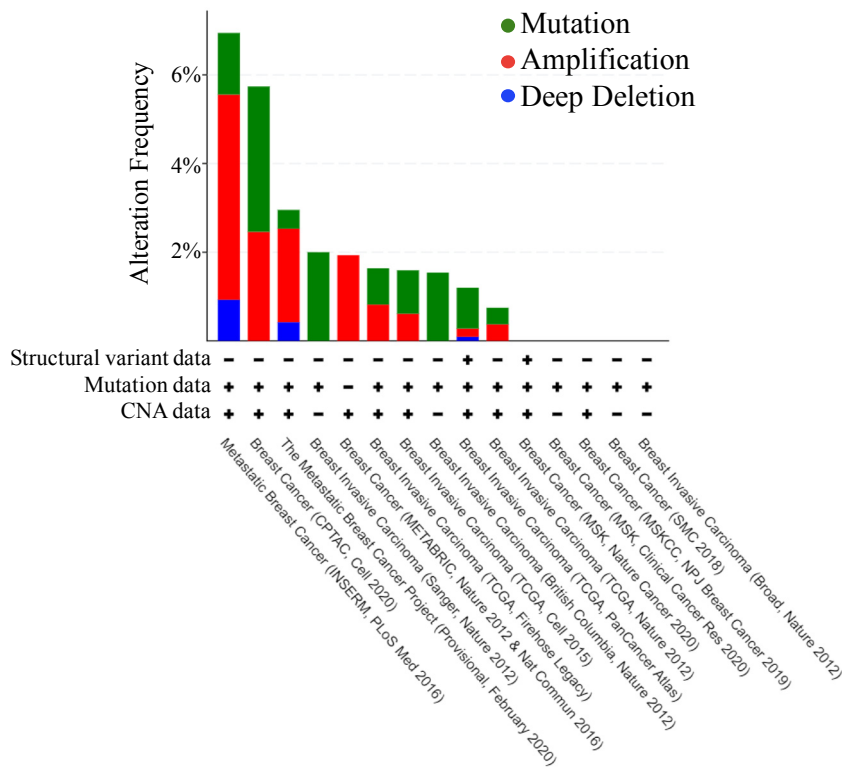

**B**

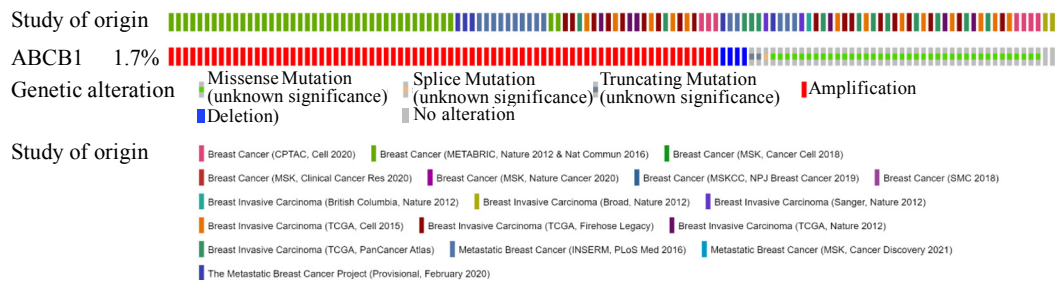

14

15 **Figure S3** Alteration of *ABCB1* gene in breast cancer. (A) Total 15 datasets with 10

16 928 samples are selected from cBioPortal. Percentage of mutation, amplification, deep

17 deletion of *ABCB1* gene is showed. (B) All forms of genetic alteration of *ABCB1* gene

18 are listed, including missense mutation, splice mutation, truncating mutation,

19 amplification or deep deletion.

20

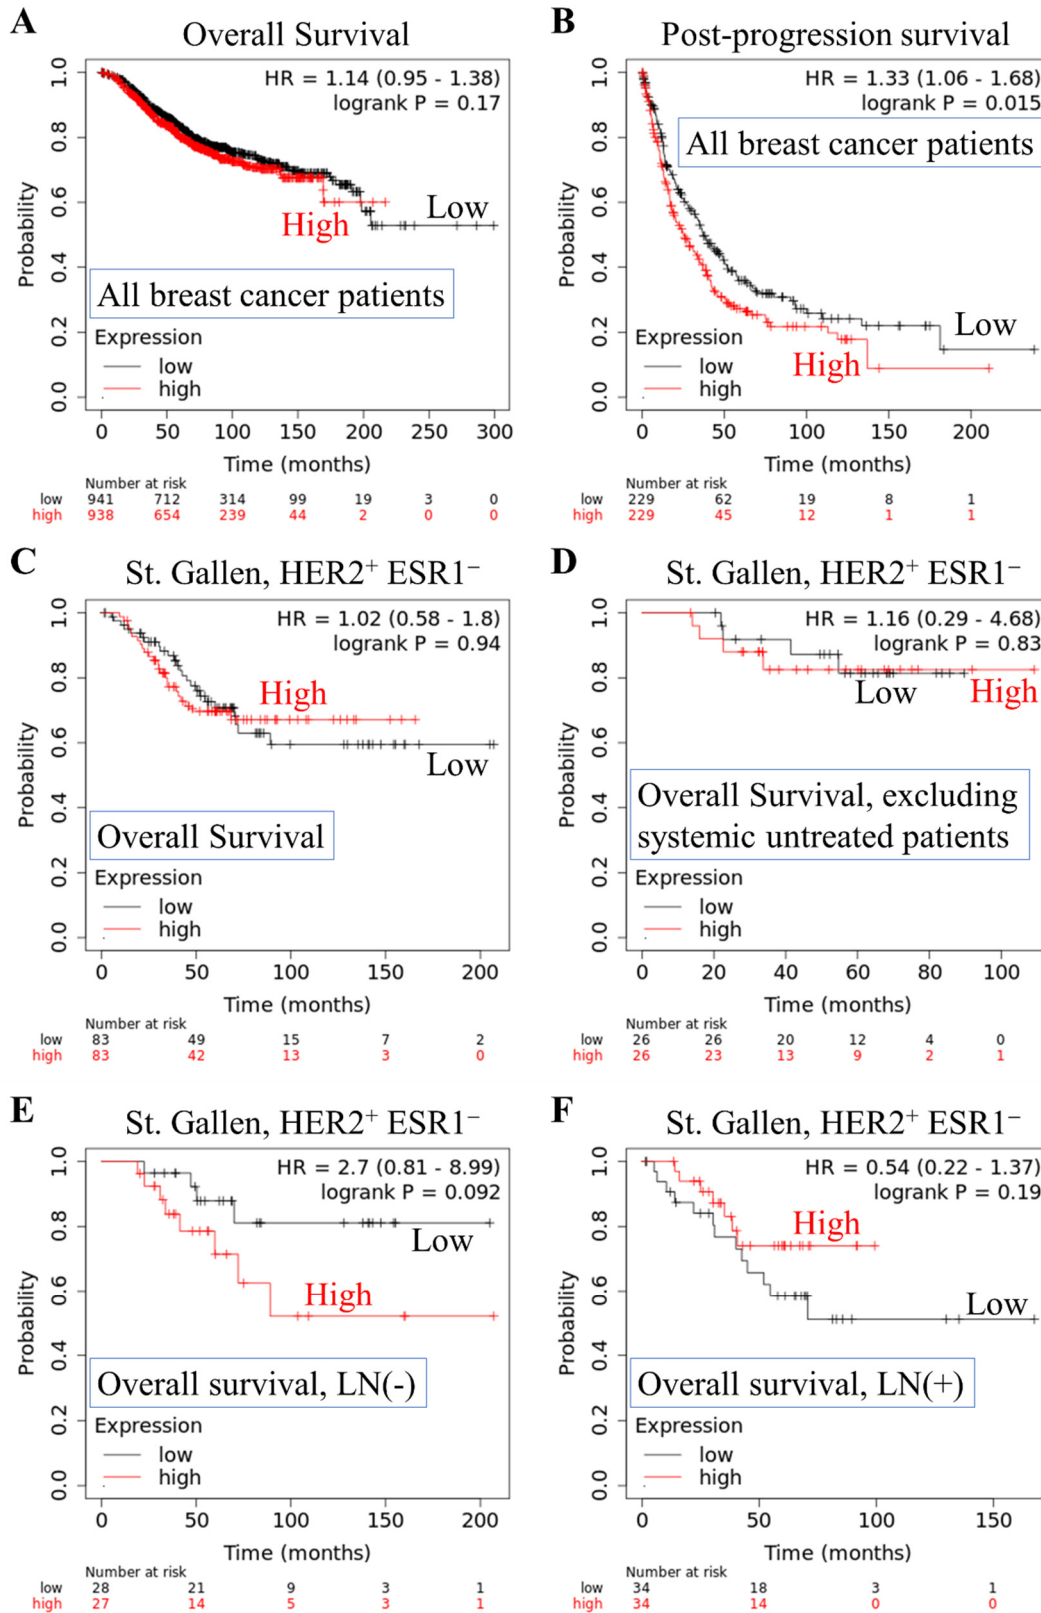

21

22 **Figure S4** Comparison of the expression of *ABCB1* mRNA in Kaplan-Meier Plotter

23 and survival of breast cancer patients. (A) Overall survival of all breast cancer patients.

24 (B) Post-progression survival of all breast cancer patients. (C) According to St. Gallen  
25 molecular subtypes, HER2<sup>+</sup>, ESR1<sup>-</sup> breast cancer patients were selected and overall  
26 survival was compared between high or low expression of *ABCB1*. (D) Overall survival  
27 of HER2<sup>+</sup>, ESR1<sup>-</sup> breast cancer patients, excluding the patients without systemic  
28 treatment. (E) Overall survival of HER2<sup>+</sup>, ESR1<sup>-</sup> breast cancer patients without lymph  
29 node metastasis. (F) Overall survival of HER2<sup>+</sup>, ESR1<sup>-</sup> breast cancer patients with  
30 lymph node metastasis. ESR1, estrogen receptor 1; HER2, human epidermal growth  
31 factor receptor type II; HR, hazard ratio; LN, lymph node.  
32

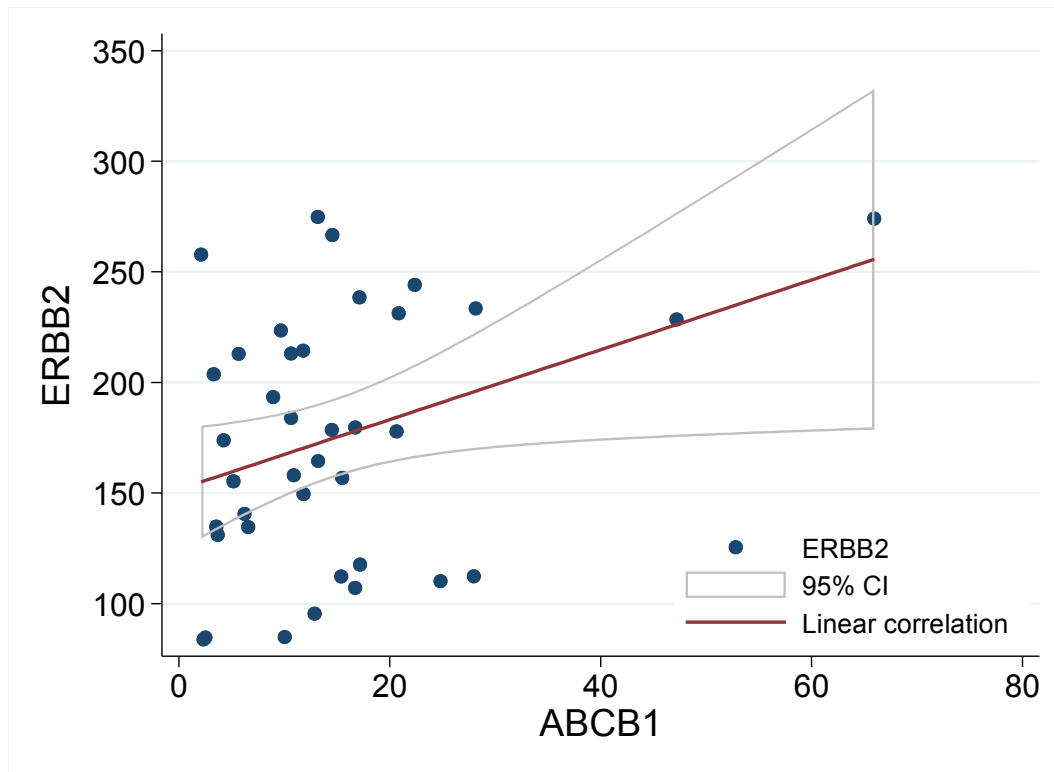

33

34 **Figure S5** Linear correlation between ABCB1 and ERBB2 mRNA in 38 breast cancer

35 patients from GSE43837 dataset. Spearman's rank correlation coefficient = 0.255 with

36 95% CI: -0.070 to 0.532, *P* value = 0.1219.

37

38

39

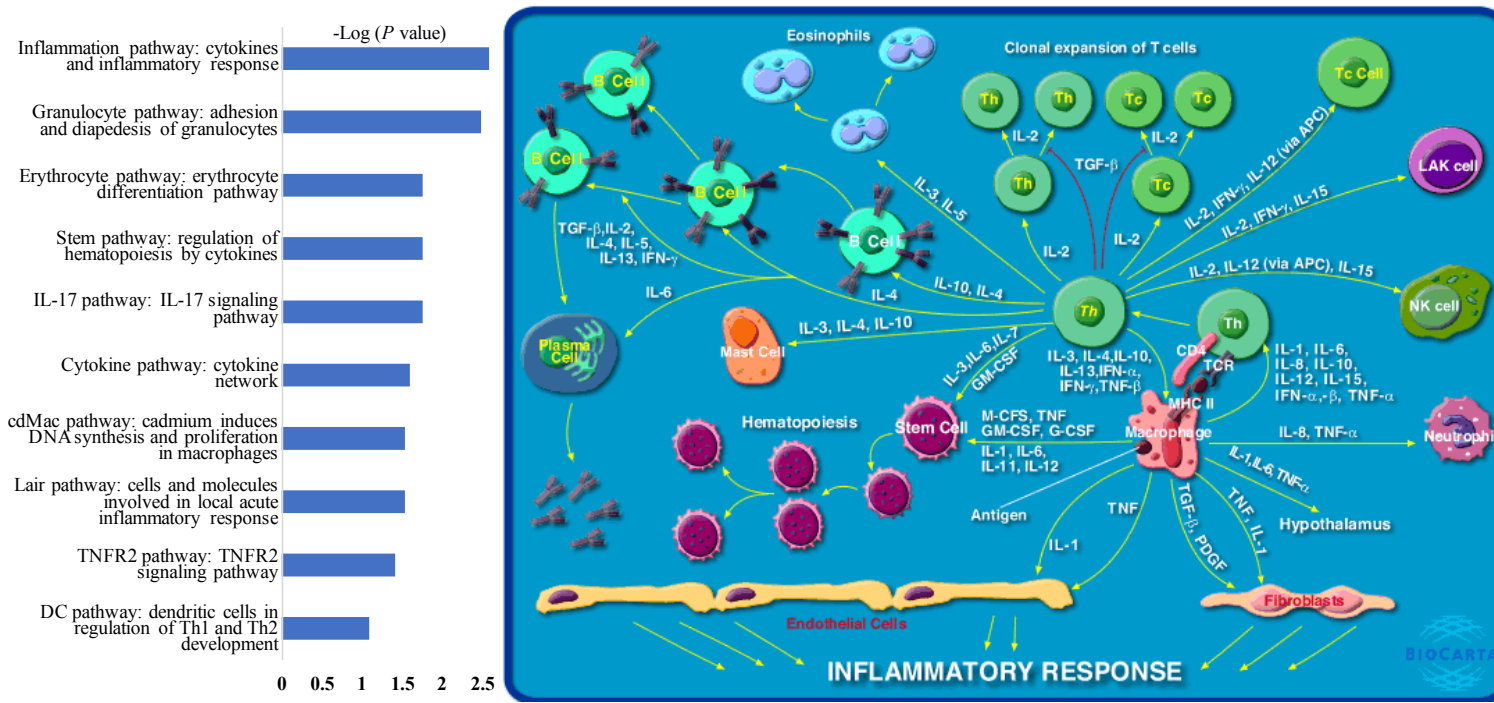

**Table S1** Sequence of primers for qPCR.

| Gene         | Sequence of primer                                                                         | Amplicon length (bp) |
|--------------|--------------------------------------------------------------------------------------------|----------------------|
| <i>IL6</i>   | Sense: CAT GTG TGA AAG CAG CAA AGA GGC<br>Antisense: CAG GCA AGT CTC CTC ATT GAA TCC AG    | 109                  |
| <i>CSF1</i>  | Sense: CTG CTG TTG TTG GTC TGT CTC CTG<br>Antisense: CAG GTG TCC ACT CCC AAT CAT GTG       | 90                   |
| <i>CSF3</i>  | Sense: CCC TCC CCA TCC CAT GTA TTT ATC TC<br>Antisense: CCG TTC TGC TCT TCC CTG TCT TTA    | 84                   |
| <i>PTGS2</i> | Sense: CTG CCT CAA TTC AGT CTC TCA TCT GC<br>Antisense: GAG CTC TGG ATC TGG AAC ACT GAA TG | 80                   |
| <i>VEGFA</i> | Sense: CAG AAG GAG GAG GGC AGA ATC ATC A<br>Antisense: AGG GTC TCG ATT GGA TGG CAG TAG     | 85                   |
| <i>GAPDH</i> | Sense: AGC CAC ATC GCT CAG ACA C<br>Antisense: GCC CAA TAC GAC CAA ATC C                   | 66                   |



**Table S2** Tumor size of P1 PDX mice.

| Days after implantation | Tumor volume (mm <sup>3</sup> ) |    |       |       |       |       |       |       |       |       |
|-------------------------|---------------------------------|----|-------|-------|-------|-------|-------|-------|-------|-------|
|                         | 8~43                            | 50 | 57    | 64    | 71    | 81    | 85    | 92    | 99    |       |
| P1-1                    | Right                           | 0  | 55.4  | 50.2  | 60.5  | 76.1  | 72.1  | 76.9  | 85.6  | 73.7  |
|                         | Left                            | 0  | 40.3  | 95.2  | 141.0 | 41.6  | 98.8  | 111.5 | 146.7 | 126.9 |
| P1-2                    | Right                           | 0  | 50.6  | 49.6  | 137.8 | 106.3 | 399.9 | 190.1 | *     | *     |
|                         | Left                            | 0  | 130.3 | 160.4 | 266.0 | 364.6 | 250.0 | 751.1 | *     | *     |
| P1-3                    | Right                           | 0  | 176.1 | 159.0 | 186.6 | 261.7 | 111.8 | 464.4 | 794.0 | *     |
|                         | Left                            | 0  | 161.0 | 173.3 | 226.1 | 301.5 | 474.3 | 315.0 | 596.0 | *     |

\*The mice were sacrificed and the cancer tissues were transplanted to P2 mice.

44

45
